# Supplementary material
Source: Atypon-hosted journal article supplement (https://jpma.org.pk/PdfDownloadsupplements/569)
Supplement: 569 [file 569]

One moment, please...


# Please wait while your request is being verified...
